## Correction

# Correction: Evaluation of the Accuracy of Anthropometric Clinical Indicators of Visceral Fat in Adults and Elderly

The *PLOS ONE* Staff

There are errors in the first sentence of the fourth paragraph of the “Anthropometric clinical indicators” subsection of the Methods and Materials. The correct sentence is: The VAI was obtained by the formulas proposed by Amato et al. (2010) [4]: for females,  $VAI = (WC/36.58 + (1.89 \times BMI)) \times (TG/0.81) \times (1.52/HDL)$  and males,  $VAI = (WC/39.68 + (1.88 \times BMI)) \times (TG/1.03) \times (1.31/HDL)$ .

## Reference

1. Roriz AKC, Passos LCS, de Oliveira CC, Eickemberg M, Moreira PdA, et al. (2014) Evaluation of the Accuracy of Anthropometric Clinical Indicators of Visceral Fat in Adults and Elderly. *PLoS ONE* 9(7): e103499. doi:10.1371/journal.pone.0103499

**Citation:** The *PLOS ONE* Staff (2014) Correction: Evaluation of the Accuracy of Anthropometric Clinical Indicators of Visceral Fat in Adults and Elderly. *PLoS ONE* 9(12): e116449. doi:10.1371/journal.pone.0116449

**Published:** December 19, 2014

**Copyright:** © 2014 The *PLOS ONE* Staff. This is an open-access article distributed under the terms of the Creative Commons Attribution License, which permits unrestricted use, distribution, and reproduction in any medium, provided the original author and source are credited.
